# Supplementary material for: A phase 2 trial of neoadjuvant metformin in combination with trastuzumab and chemotherapy in women with early HER2-positive breast cancer: the METTEN study
Source: PubMed Central journal article supplement (PMC6235018; doi:10.18632/oncotarget.26286), 2018-11-02
Supplement: oncotarget-09-35687-s001.pdf [file oncotarget-09-35687-s001.pdf]

# A phase 2 trial of neoadjuvant metformin in combination with trastuzumab and chemotherapy in women with early HER2-positive breast cancer: the METTEN study

## SUPPLEMENTARY MATERIALS

### MATERIALS AND METHODS

#### Inclusion criteria

Age 18–75 years, baseline Eastern Cooperative Oncology Group performance status 0 or 1, and baseline left ventricular ejection fraction (LVEF)  $\geq 50\%$  measured by echocardiography or multiple gated acquisition, normal organ and bone marrow function (absolute neutrophil count  $\geq 1,500/\mu\text{L}$ , platelets  $\geq 100,000/\mu\text{L}$ , total bilirubin  $\leq 1.5$  times the upper limit of normal [ULN], serum creatinine  $\leq 1.5$  times the ULN, AST and ALT  $\leq 2.5$  times the ULN), ability to swallow and retain oral medication, and blood glucose levels  $\geq 70$  mg/dL (3.9 mmol/L).

#### Exclusion criteria

Key exclusion criteria were metastatic disease, bilateral BC, any prior treatment for BC, other malignancies or less than 10 years from prior malignancies (except curatively treated basal cell carcinoma, squamous cell carcinoma of the skin, or carcinoma *in situ* of the cervix), inadequate renal function (creatinine clearance  $< 60$  mL/min), impaired liver function, enolism (average consumption of 3 alcoholic beverages/day), significant dementia, altered mental status (or any psychiatric condition that would prohibit the understanding or rendering of informed consent), pregnancy and lactation.

#### Analytical method for determination of metformin in serum

Serum samples were thawed on ice, spiked with 5 ppm of phenformin as internal standard, and treated with

methanol to remove protein content before analysis. The mixture was vortex-assisted and then centrifuged for 10 min at 10,000 r.p.m. at 4° C in a Sorvall ST 16R Centrifuge (Thermo Scientific, Waltham, MA, USA). The supernatants were then analyzed by HPLC-ESI-QTOF-MS using an Agilent 1260 HPLC instrument (Agilent Technologies, Palo Alto, CA, USA) coupled to an Agilent 6540 Ultra High Definition (UHD) Accurate Mass Q-TOF equipped with a Jet Stream dual ESI interface. Compounds were separated using a reversed-phase C18 analytical column (Agilent Zorbax Eclipse Plus, 1.8  $\mu\text{m}$ , 4.5  $\times$  150 mm) protected by a guard column cartridge containing the same packing material as the analytical column. The mobile phases were an aqueous solution of ammonium acetate (5 mmol/L, pH=4) and acetonitrile as solvent A and B, respectively. The following gradient of the mobile phases was used to obtain an efficient separation: 0.0–5.0 min [A:B 95/5], 25.0 min [A:B 80/20], 30.0 min [A:B 5/95], 35.0–45.0 min [A:B 95/5]. The column and auto-sampler compartment temperatures were set at 25° C and 4° C, respectively, whereas the flow rate and the injection volume were 0.5 mL/min and 5  $\mu\text{L}$ . The detection was performed in positive-ion mode at a range of 100–500 *m/z*. Ultrahigh pure nitrogen was used as both, drying and nebulizing gas at temperatures of 200° C and 325° C and flows of 10 and 12 L/min, respectively. The MS data were processed using MassHunter workstation software (version B.07.00, Qualitative Analysis (Agilent Technologies, USA).

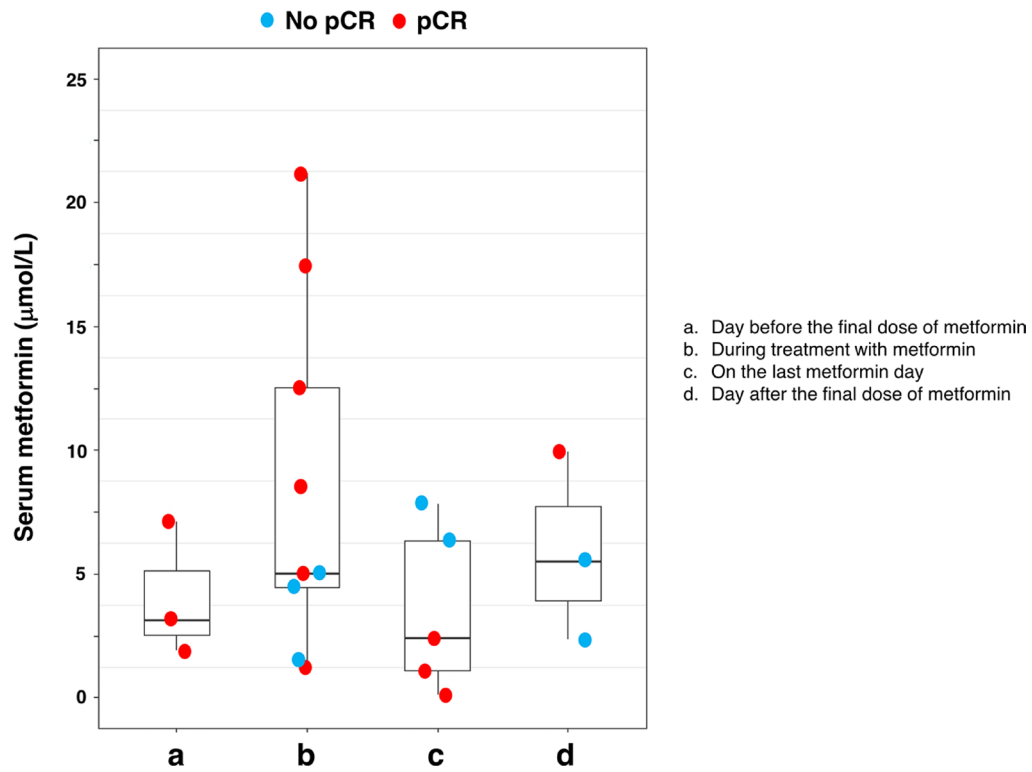

**Supplementary Figure 1: Circulating serum metformin.** Box plots indicating median (black lines within the boxes), interquartile ranges, whiskers and ranges for post-treatment levels of circulating serum metformin ( $\mu\text{mol/L}$ ). (pCR: pathological complete response).

**Supplementary Table 1: Baseline patient demographic and tumor characteristics for the PP efficacy population**

|                                   | <b>Arm A (N = 29)</b>  | <b>Arm B (N = 29)</b>  | <b>P value</b> |
|-----------------------------------|------------------------|------------------------|----------------|
| <b>Age (years)</b>                |                        |                        | 0.594          |
| <50                               | 18 (62.1%)             | 16 (55.2%)             |                |
| ≥50                               | 11 (37.9%)             | 13 (44.8%)             |                |
| Mean ± SD (range)                 | 45.3 ± 9.8 (26–65)     | 48.5 ± 11.8 (23–71)    | 0.254          |
| <b>Menopausal status</b>          |                        |                        | 0.286          |
| Post                              | 10 (34.5%)             | 14 (48.3%)             |                |
| Pre                               | 19 (65.5%)             | 15 (51.7%)             |                |
| <b>Body weight (kg)</b>           |                        |                        |                |
| Mean ± SD (range)                 | 64.7 ± 9.8 (45.3–89.0) | 64.2 ± 9.0 (48.0–82.0) | 0.634          |
| <b>Body-mass index (BMI)</b>      |                        |                        | 0.793          |
| <25                               | 15 (51.7%)             | 14 (48.3%)             |                |
| ≥25 (overweight)                  | 14 (48.3%)             | 15 (51.7%)             |                |
| <b>Clinical tumor status</b>      |                        |                        | 0.300          |
| cT2                               | 19 (65.5%)             | 17 (58.6%)             |                |
| cT3                               | 10 (34.5%)             | 9 (31.0%)              |                |
| cT4a                              | 0 (0.0%)               | 1 (3.4%)               |                |
| cT4b                              | 0 (0.0%)               | 2 (6.9%)               |                |
| <b>Clinical nodal stage</b>       |                        |                        | 0.652          |
| cN0                               | 8 (27.6%)              | 8 (27.6%)              |                |
| cN1                               | 17 (58.6%)             | 15 (51.7%)             |                |
| cN2                               | 1 (3.4%)               | 4 (13.7%)              |                |
| cN3                               | 3 (10.3%)              | 2 (6.9%)               |                |
| <b>Hormone receptor status</b>    |                        |                        | 0.188          |
| ER & PgR                          |                        |                        |                |
| ER and/or PgR positive            | 13 (44.8%)             | 18 (62.1%)             |                |
| ER and PgR negative               | 16 (55.2%)             | 11 (37.9%)             |                |
| <b>Tumor grade</b>                |                        |                        | 0.197          |
| G1                                | 2 (10.0%)              | 0 (0.0%)               |                |
| G2                                | 7 (35.0%)              | 14 (58.3%)             |                |
| G3                                | 11 (55.5%)             | 10 (41.7%)             |                |
| Unknown                           | 9                      | 5                      |                |
| <b>Baseline LVEF (%)</b>          |                        |                        | 0.499          |
| (50–55)                           | 3 (10.3%)              | 1 (3.4%)               |                |
| (55–60)                           | 7 (24.1%)              | 5 (17.2%)              |                |
| (60–65)                           | 6 (20.7%)              | 11 (37.9%)             |                |
| (65–70)                           | 9 (31.0%)              | 9 (31.0%)              |                |
| ≥70                               | 4 (13.8%)              | 3 (10.3%)              |                |
| <b>Type of programmed surgery</b> |                        |                        | 0.107          |
| Breast-conserving                 | 21 (80.8%)             | 18 (64.3%)             |                |
| Mastectomy                        | 5 (19.2%)              | 10 (35.7%)             |                |
| Unknown                           | 3                      | 1                      |                |

**Supplementary Table 2: Causes for treatment interruption in the mITT population**

| Patient code | Treatment Arm | Reason                                                      | Related to treatment                        |
|--------------|---------------|-------------------------------------------------------------|---------------------------------------------|
| 619          | A             | Tzb was interrupted (week 22) due to reduced LVEF (grade 2) | Definite (trastuzumab)                      |
| 1210         | A             | Patient declines further follow-up evaluation               | Unrelated                                   |
| 1501         | A             | Diarrhea (grade 3)                                          | Definite (metformin), probable (paclitaxel) |
| 1508         | A             | Diarrhea (grade 3)                                          | Definite (metformin), probable (paclitaxel) |
| 1509         | A             | Diarrhea (grade 3)                                          | Definite (metformin), probable (paclitaxel) |
| 1510         | A             | Inter-recurrent disease (septic arthritis, grade 3)         | Possible (metformin, FEC)                   |
| 1523         | A             | Diarrhea (grade 3)                                          | Definite (metformin), probable (paclitaxel) |
| 1525         | A             | Diarrhea (grade 3)                                          | Definite (metformin), probable (paclitaxel) |
| 1526         | A             | Allergic reaction (grade 2)                                 | Probable (metformin)                        |
| 603          | B             | Reduced LVEF (grade 2)                                      | Definite (trastuzumab)                      |
| 607          | B             | Skin toxicity (grade 2); Reduced LVEF (grade 2)             | Definite (paclitaxel, trastuzumab)          |
| 1007         | B             | Patient refuse further treatment (4th FEC-Tzb cycle)        | Unrelated                                   |
| 1518         | B             | Symptomatic LVEF decline (grade 3)                          | Definite (trastuzumab)                      |

Tzb: Trastuzumab.

**Supplementary Table 3: Surgery and pathologic response in the mITT population**

|                                       | Arm A (N = 38) | Arm B (N = 41) | P value |
|---------------------------------------|----------------|----------------|---------|
| <b>Type of surgery</b>                |                |                |         |
| Mastectomy                            | 8 (21.6%)      | 16 (39.0%)     | 0.096   |
| Breast-conserving surgery             | 29 (78.4%)     | 25 (61.0%)     |         |
| <b>Response</b>                       |                |                |         |
| pCR                                   |                |                | 0.587   |
| No                                    | 19 (50.0%)     | 18 (43.9%)     |         |
| Yes                                   | 19 (50.0%)     | 23 (56.1%)     |         |
| <b>Type of surgery &amp; response</b> |                |                |         |
| Mastectomy (N = 24)                   |                |                |         |
| pCR                                   |                |                | 0.211   |
| No                                    | 6 (75.0%)      | 7 (43.8%)      |         |
| Yes                                   | 2 (25.0%)      | 9 (56.3%)      |         |
| Breast-conserving surgery (N = 54)    |                |                |         |
| pCR                                   |                |                | 0.846   |
| No                                    | 12 (41.4%)     | 11 (44.0%)     |         |
| Yes                                   | 17 (58.6%)     | 14 (56.0%)     |         |

**Supplementary Table 4: Univariable analysis of factors associated with a pCR in the mITT population**

| <b>Category</b>              | <b>No pCR N (%)</b> | <b>pCR N (%)</b> | <b>OR (95% CI)</b> | <b>P value</b> |
|------------------------------|---------------------|------------------|--------------------|----------------|
| <b>Arm</b>                   |                     |                  |                    |                |
| B                            | 18 (43.9%)          | 23 (56.1%)       | 1                  |                |
| A                            | 19 (50.0%)          | 19 (50.0%)       | 0.78 (0.32–1.90)   | 0.588          |
| <b>Age (years)</b>           |                     |                  |                    |                |
| <50                          | 24 (51.1%)          | 23 (48.9%)       |                    |                |
| ≥50                          | 13 (40.6%)          | 19 (59.4%)       | 1.53 (0.62–3.78)   | 0.362          |
| <b>Clinical tumor stage</b>  |                     |                  |                    |                |
| ≥T3                          | 15 (53.6%)          | 13 (46.4%)       | 1                  |                |
| T2                           | 22 (43.1%)          | 29 (56.9%)       | 1.52 (0.60–3.84)   | 0.375          |
| <b>Clinical nodal status</b> |                     |                  |                    |                |
| $N \geq 2$                   | 6 (46.2%)           | 7 (53.8%)        | 1                  |                |
| N0–1                         | 31 (47.0%)          | 35 (53.0%)       | 0.97 (0.29–3.19)   | 0.957          |
| <b>ER</b>                    |                     |                  |                    |                |
| Positive                     | 22 (52.4%)          | 20 (47.6%)       | 1                  |                |
| Negative                     | 15 (40.5%)          | 22 (59.5%)       | 1.61 (0.66–3.94)   | 0.294          |
| <b>PgR</b>                   |                     |                  |                    |                |
| Positive                     | 20 (64.5%)          | 11 (35.5%)       | 1                  |                |
| Negative                     | 17 (35.4%)          | 31 (64.6%)       | 3.32 (1.29–8.52)   | 0.013          |
| <b>HR status</b>             |                     |                  |                    |                |
| Positive                     | 23 (53.5%)          | 20 (46.5%)       | 1                  |                |
| Negative                     | 14 (38.9%)          | 22 (61.1%)       | 1.81 (0.74–4.44)   | 0.197          |

OR, odds ratio.

**Supplementary Table 5: Bivariable analysis of factors associated with pCR in the PP efficacy population**

| Category                     |          | N  | OR (95% CI)       | P value |
|------------------------------|----------|----|-------------------|---------|
| <b>Arm</b>                   |          |    |                   |         |
|                              | B        | 29 | 1                 |         |
|                              | A        | 29 | 1.46 (0.49–4.39)  | 0.498   |
| <b>Age (years)</b>           |          |    |                   |         |
|                              | <50      | 34 | 1                 |         |
|                              | ≥50      | 24 | 2.76 (0.87–8.67)  | 0.085   |
| <b>Arm</b>                   |          |    |                   |         |
|                              | B        | 29 | 1                 |         |
|                              | A        | 29 | 1.26 (0.42–3.81)  | 0.680   |
| <b>Clinical tumor stage</b>  |          |    |                   |         |
|                              | ≥T3      | 23 | 1                 |         |
|                              | T2       | 35 | 2.67 (0.89–8.07)  | 0.081   |
| <b>Arm</b>                   |          |    |                   |         |
|                              | B        | 29 | 1                 |         |
|                              | A        | 29 | 1.33 (0.46–3.89)  | 0.596   |
| <b>Clinical nodal status</b> |          |    |                   |         |
|                              | N ≥ 2    | 10 | 1                 |         |
|                              | N0-1     | 48 | 1.07 (0.26–4.36)  | 0.921   |
| <b>Arm</b>                   |          |    |                   |         |
|                              | B        | 24 | 1                 |         |
|                              | A        | 20 | 1.40 (0.40–4.86)  | 0.596   |
| <b>Tumor grade</b>           |          |    |                   |         |
|                              | G3       | 21 | 1                 |         |
|                              | G1/2     | 23 | 1.47 (0.43–5.07)  | 0.538   |
| <b>Arm</b>                   |          |    |                   |         |
|                              | B        | 29 | 1                 |         |
|                              | A        | 29 | 1.26 (0.43–3.72)  | 0.670   |
| <b>ER</b>                    |          |    |                   |         |
|                              | Positive | 30 | 1                 |         |
|                              | Negative | 28 | 1.57 (0.53–4.62)  | 0.417   |
| <b>Arm</b>                   |          |    |                   |         |
|                              | B        | 29 | 1                 |         |
|                              | A        | 29 | 1.32 (0.43–4.03)  | 0.630   |
| <b>PgR</b>                   |          |    |                   |         |
|                              | Positive | 23 | 1                 |         |
|                              | Negative | 35 | 3.74 (1.22–11.49) | 0.021   |
| <b>Arm</b>                   |          |    |                   |         |
|                              | B        | 29 | 1                 |         |
|                              | A        | 29 | 1.21 (0.41–3.59)  | 0.734   |
| <b>HR status</b>             |          |    |                   |         |
|                              | Positive | 31 | 1                 |         |
|                              | Negative | 27 | 1.90 (0.63–5.71)  | 0.256   |

OR, odds ratio.

**Supplementary Table 6: Bivariable analysis of factors associated with pCR in the mITT population**

| Category                     |          | N  | OR (95% CI)      | P value |
|------------------------------|----------|----|------------------|---------|
| <b>Arm</b>                   |          |    |                  |         |
|                              | B        | 41 | 1                |         |
|                              | A        | 38 | 0.77 (0.32–1.88) | 0.566   |
| <b>Age (years)</b>           |          |    |                  |         |
|                              | <50      | 47 | 1                |         |
|                              | ≥50      | 32 | 1.54 (0.62–3.83) | 0.352   |
| <b>Arm</b>                   |          |    |                  |         |
|                              | B        | 41 | 1                |         |
|                              | A        | 38 | 0.77 (0.32–1.88) | 0.570   |
| <b>Clinical tumor stage</b>  |          |    |                  |         |
|                              | ≥T3      | 28 | 1                |         |
|                              | T2       | 51 | 1.53 (0.61–3.88) | 0.367   |
| <b>Arm</b>                   |          |    |                  |         |
|                              | B        | 41 | 1                |         |
|                              | A        | 38 | 0.78 (0.32–1.90) | 0.589   |
| <b>Clinical nodal status</b> |          |    |                  |         |
|                              | N ≥ 2    | 13 | 1                |         |
|                              | N0–1     | 66 | 1.00 (0.30–3.30) | 0.994   |
| <b>Arm</b>                   |          |    |                  |         |
|                              | B        | 41 | 1                |         |
|                              | A        | 38 | 0.63 (0.23–1.75) | 0.375   |
| <b>Tumor grade</b>           |          |    |                  |         |
|                              | G3       | 29 | 1                |         |
|                              | G1/2     | 32 | 0.79 (0.29–2.19) | 0.655   |
| <b>Arm</b>                   |          |    |                  |         |
|                              | B        | 41 | 1                |         |
|                              | A        | 38 | 0.76 (0.31–1.85) | 0.541   |
| <b>ER</b>                    |          |    |                  |         |
|                              | Positive | 42 | 1                |         |
|                              | Negative | 37 | 1.65 (0.67–4.04) | 0.277   |
| <b>Arm</b>                   |          |    |                  |         |
|                              | B        | 41 | 1                |         |
|                              | A        | 38 | 0.82 (0.3–2.07)  | 0.676   |
| <b>PgR</b>                   |          |    |                  |         |
|                              | Positive | 31 | 1                |         |
|                              | Negative | 48 | 3.29 (1.28–8.46) | 0.014   |
| <b>Arm</b>                   |          |    |                  |         |
|                              | B        | 41 | 1                |         |
|                              | A        | 38 | 0.74 (0.30–1.82) | 0.508   |
| <b>HR status</b>             |          |    |                  |         |
|                              | Positive | 43 | 1                |         |
|                              | Negative | 36 | 1.86 (0.75–4.61) | 0.179   |

OR, odds ratio.

**Supplementary Table 7: Association of hormonal receptor status with a pCR in the PP efficacy population**

| <b>Sub-population</b>     | <b>No pCR N (%)</b> | <b>pCR N (%)</b> | <b>OR (95% CI)</b> | <b>P value</b> |
|---------------------------|---------------------|------------------|--------------------|----------------|
| <b>ER positive</b>        |                     |                  |                    |                |
| Arm B                     | 7 (41.2%)           | 10 (58.8%)       | 1                  |                |
| Arm A                     | 6 (46.2%)           | 7 (53.2%)        | 0.82 (0.19–3.50)   | 0.785          |
| <b>ER negative</b>        |                     |                  |                    |                |
| Arm B                     | 5 (41.7%)           | 7 (58.3%)        |                    |                |
| Arm A                     | 4 (25.0%)           | 12 (75.0%)       | 2.14 (0.43–10.74)  | 0.354          |
| <b>PgR positive</b>       |                     |                  |                    |                |
| Arm B                     | 7 (58.3%)           | 5 (41.7%)        | 1                  |                |
| Arm A                     | 6 (54.6%)           | 5 (45.4%)        | 1.17 (0.22–6.08)   | 0.855          |
| <b>PgR negative</b>       |                     |                  |                    |                |
| Arm B                     | 5 (29.4%)           | 12 (70.6%)       | 1                  |                |
| Arm A                     | 4 (22.2%)           | 14 (77.8%)       | 1.46 (0.32–6.70)   | 0.628          |
| <b>HR status positive</b> |                     |                  |                    |                |
| Arm B                     | 8 (44.4%)           | 10 (55.6%)       | 1                  |                |
| Arm A                     | 6 (46.2%)           | 7 (53.8%)        | 0.93 (0.22–3.91)   | 0.925          |
| <b>HR status negative</b> |                     |                  |                    |                |
| Arm B                     | 4 (36.4%)           | 7 (63.6%)        | 1                  |                |
| Arm A                     | 4 (25.0%)           | 12 (75.0%)       | 1.71 (0.32–9.11)   | 0.527          |

OR, odds ratio.

**Supplementary Table 8: Association of hormonal receptor status with a pCR in the mITT efficacy population**

| <b>Sub-population</b>     | <b>No pCR N (%)</b> | <b>pCR N (%)</b> | <b>OR (95% CI)</b> | <b>P value</b> |
|---------------------------|---------------------|------------------|--------------------|----------------|
| <b>ER positive</b>        |                     |                  |                    |                |
| Arm B                     | 10 (43.5%)          | 13 (56.5%)       | 1                  |                |
| Arm A                     | 12 (63.2%)          | 7 (36.8%)        | 0.45 (0.19–3.50)   | 0.207          |
| <b>ER negative</b>        |                     |                  |                    |                |
| Arm B                     | 8 (44.4%)           | 10 (55.6%)       |                    |                |
| Arm A                     | 7 (36.8%)           | 12 (63.2%)       | 1.37 (0.38–5.12)   | 0.638          |
| <b>PgR positive</b>       |                     |                  |                    |                |
| Arm B                     | 9 (60.0%)           | 6 (40.0%)        | 1                  |                |
| Arm A                     | 11 (68.8%)          | 5 (31.2%)        | 0.68 (0.16–2.99)   | 0.612          |
| <b>PgR negative</b>       |                     |                  |                    |                |
| Arm B                     | 9 (34.6%)           | 17 (65.4%)       | 1                  |                |
| Arm A                     | 8 (36.4%)           | 14 (63.6%)       | 0.93 (0.28–3.03)   | 0.900          |
| <b>HR status positive</b> |                     |                  |                    |                |
| Arm B                     | 11 (45.8%)          | 13 (54.2%)       | 1                  |                |
| Arm A                     | 12 (63.2%)          | 7 (36.4%)        | 0.49 (0.14–1.69)   | 0.261          |
| <b>HR status negative</b> |                     |                  |                    |                |
| Arm B                     | 7 (41.2%)           | 10 (58.8%)       | 1                  |                |
| Arm A                     | 7 (36.8%)           | 12 (63.2%)       | 1.20 (0.31–4.59)   | 0.790          |

OR, odds ratio.



**Supplementary Table 9: Other adverse events reported as possibly, probably, or definitely related to treatment in the mITT safety population**

|                           | Arm A (N = 38) |     |          |     |          |     |          |     | Arm B (N = 41) |     |           |     |          |     |          |     |
|---------------------------|----------------|-----|----------|-----|----------|-----|----------|-----|----------------|-----|-----------|-----|----------|-----|----------|-----|
|                           | Grade 1        |     | Grade 2  |     | Grade 3  |     | Grade 4  |     | Grade 1        |     | Grade 2   |     | Grade 3  |     | Grade 4  |     |
|                           | N              | %   | N        | %   | N        | %   | N        | %   | N              | %   | N         | %   | N        | %   | N        | %   |
| Respiratory infection     | 0              | 0.0 | 0        | 0.0 | 0        | 0.0 | 0        | 0.0 | 0              | 0.0 | 1         | 2.4 | 0        | 0.0 | 0        | 0.0 |
| Otitis                    | 0              | 0.0 | 0        | 0.0 | 0        | 0.0 | 0        | 0.0 | 0              | 0.0 | 1         | 2.4 | 0        | 0.0 | 0        | 0.0 |
| Conjunctivitis            | 2              | 5.3 | 1        | 2.6 | 0        | 0.0 | 0        | 0.0 | 3              | 7.3 | 1         | 2.4 | 0        | 0.0 | 0        | 0.0 |
| Adriamycin extravasation  | 0              | 0.0 | 0        | 0.0 | 0        | 0.0 | 0        | 0.0 | 0              | 0.0 | 1         | 2.4 | 0        | 0.0 | 0        | 0.0 |
| Lymphangitis              | 0              | 0.0 | 0        | 0.0 | 0        | 0.0 | 0        | 0.0 | 0              | 0.0 | 1         | 2.4 | 0        | 0.0 | 0        | 0.0 |
| Allergic reaction         | 1              | 2.6 | 3        | 7.9 | 0        | 0.0 | 0        | 0.0 | 0              | 0.0 | 2         | 4.9 | 0        | 0.0 | 0        | 0.0 |
| Dysarthria                | 1              | 2.6 | 0        | 0.0 | 0        | 0.0 | 0        | 0.0 | 0              | 0.0 | 0         | 0.0 | 0        | 0.0 | 0        | 0.0 |
| Folliculitis              | 1              | 2.6 | 0        | 0.0 | 0        | 0.0 | 0        | 0.0 | 0              | 0.0 | 0         | 0.0 | 0        | 0.0 | 0        | 0.0 |
| Cellulitis                | 0              | 0.0 | 1        | 2.6 | 0        | 0.0 | 0        | 0.0 | 0              | 0.0 | 0         | 0.0 | 0        | 0.0 | 0        | 0.0 |
| Oral thrush               | 0              | 0.0 | 0        | 0.0 | 0        | 0.0 | 0        | 0.0 | 1              | 2.4 | 0         | 0.0 | 0        | 0.0 | 0        | 0.0 |
| Chest pain                | 0              | 0.0 | 0        | 0.0 | 0        | 0.0 | 0        | 0.0 | 0              | 0.0 | 1         | 2.4 | 0        | 0.0 | 0        | 0.0 |
| Hot flushes               | 0              | 0.0 | 0        | 0.0 | 0        | 0.0 | 0        | 0.0 | 1              | 2.4 | 0         | 0.0 | 0        | 0.0 | 0        | 0.0 |
| Abdominal pain            | 2              | 5.3 | 0        | 0.0 | 0        | 0.0 | 0        | 0.0 | 1              | 2.4 | 0         | 0.0 | 0        | 0.0 | 0        | 0.0 |
| Bone pain                 | 2              | 5.3 | 0        | 0.0 | 0        | 0.0 | 0        | 0.0 | 1              | 2.4 | 0         | 0.0 | 0        | 0.0 | 0        | 0.0 |
| Decreased visual acuity   | 1              | 2.6 | 0        | 0.0 | 0        | 0.0 | 0        | 0.0 | 1              | 2.4 | 0         | 0.0 | 0        | 0.0 | 0        | 0.0 |
| Elevated creatinine       | 1              | 2.6 | 0        | 0.0 | 0        | 0.0 | 0        | 0.0 | 0              | 0.0 | 0         | 0.0 | 0        | 0.0 | 0        | 0.0 |
| Cold sore                 | 0              | 0.0 | 0        | 0.0 | 0        | 0.0 | 0        | 0.0 | 1              | 2.4 | 0         | 0.0 | 0        | 0.0 | 0        | 0.0 |
| Dry mouth                 | 1              | 2.6 | 0        | 0.0 | 0        | 0.0 | 0        | 0.0 | 0              | 0.0 | 0         | 0.0 | 0        | 0.0 | 0        | 0.0 |
| Tearfulness               | 1              | 2.6 | 0        | 0.0 | 0        | 0.0 | 0        | 0.0 | 3              | 7.3 | 0         | 0.0 | 0        | 0.0 | 0        | 0.0 |
| Labial herpes             | 1              | 2.6 | 0        | 0.0 | 0        | 0.0 | 0        | 0.0 | 0              | 0.0 | 0         | 0.0 | 0        | 0.0 | 0        | 0.0 |
| Tremors                   | 0              | 0.0 | 0        | 0.0 | 0        | 0.0 | 0        | 0.0 | 1              | 2.4 | 0         | 0.0 | 0        | 0.0 | 0        | 0.0 |
| Phlebitis                 | 0              | 0.0 | 0        | 0.0 | 0        | 0.0 | 0        | 0.0 | 2              | 4.9 | 1         | 2.4 | 0        | 0.0 | 0        | 0.0 |
| Nasal congestion          | 1              | 2.6 | 0        | 0.0 | 0        | 0.0 | 0        | 0.0 | 0              | 0.0 | 0         | 0.0 | 0        | 0.0 | 0        | 0.0 |
| Glassy-eyed appearance    | 1              | 2.6 | 0        | 0.0 | 0        | 0.0 | 0        | 0.0 | 0              | 0.0 | 0         | 0.0 | 0        | 0.0 | 0        | 0.0 |
| Cough                     | 1              | 2.6 | 0        | 0.0 | 0        | 0.0 | 0        | 0.0 | 0              | 0.0 | 0         | 0.0 | 0        | 0.0 | 0        | 0.0 |
| Hyperphosphatemia         | 1              | 2.6 | 0        | 0.0 | 0        | 0.0 | 0        | 0.0 | 0              | 0.0 | 0         | 0.0 | 0        | 0.0 | 0        | 0.0 |
| Micturition pain          | 1              | 2.6 | 0        | 0.0 | 0        | 0.0 | 0        | 0.0 | 0              | 0.0 | 0         | 0.0 | 0        | 0.0 | 0        | 0.0 |
| Loss of consciousness     | 0              | 0.0 | 0        | 0.0 | 0        | 0.0 | 0        | 0.0 | 1              | 2.4 | 0         | 0.0 | 0        | 0.0 | 0        | 0.0 |
| Cold                      | 0              | 0.0 | 0        | 0.0 | 0        | 0.0 | 0        | 0.0 | 1              | 2.4 | 0         | 0.0 | 0        | 0.0 | 0        | 0.0 |
| Candidiasis               | 1              | 2.6 | 0        | 0.0 | 0        | 0.0 | 0        | 0.0 | 1              | 2.4 | 0         | 0.0 | 0        | 0.0 | 0        | 0.0 |
| Urinary infection         | 0              | 0.0 | 1        | 2.6 | 0        | 0.0 | 0        | 0.0 | 2              | 4.9 | 0         | 0.0 | 0        | 0.0 | 0        | 0.0 |
| Diminished renal function | 0              | 0.0 | 0        | 0.0 | 0        | 0.0 | 0        | 0.0 | 1              | 2.4 | 0         | 0.0 | 0        | 0.0 | 0        | 0.0 |
| Rhinorrhea                | 0              | 0.0 | 0        | 0.0 | 0        | 0.0 | 0        | 0.0 | 1              | 2.4 | 0         | 0.0 | 0        | 0.0 | 0        | 0.0 |
| High platelet number      | 0              | 0.0 | 2        | 5.3 | 0        | 0.0 | 0        | 0.0 | 0              | 0.0 | 0         | 0.0 | 0        | 0.0 | 0        | 0.0 |
| Onicopathy                | 1              | 2.6 | 0        | 0.0 | 0        | 0.0 | 0        | 0.0 | 1              | 2.4 | 1         | 2.4 | 0        | 0.0 | 0        | 0.0 |
| Blurry vision             | 2              | 5.3 | 0        | 0.0 | 0        | 0.0 | 0        | 0.0 | 0              | 0.0 | 0         | 0.0 | 0        | 0.0 | 0        | 0.0 |
| Cramping                  | 1              | 2.6 | 0        | 0.0 | 0        | 0.0 | 0        | 0.0 | 0              | 0.0 | 0         | 0.0 | 0        | 0.0 | 0        | 0.0 |
| Extremity pain            | 1              | 2.6 | 1        | 2.6 | 0        | 0.0 | 0        | 0.0 | 0              | 0.0 | 0         | 0.0 | 0        | 0.0 | 0        | 0.0 |
| Photophobia               | 1              | 2.6 | 0        | 0.0 | 0        | 0.0 | 0        | 0.0 | 0              | 0.0 | 0         | 0.0 | 0        | 0.0 | 0        | 0.0 |
| Insomnia                  | 3              | 7.9 | 0        | 0.0 | 0        | 0.0 | 0        | 0.0 | 2              | 4.9 | 0         | 0.0 | 0        | 0.0 | 0        | 0.0 |
| Nervousness               | 0              | 0.0 | 0        | 0.0 | 0        | 0.0 | 0        | 0.0 | 1              | 2.4 | 0         | 0.0 | 0        | 0.0 | 0        | 0.0 |
| Gonalgia                  | 0              | 0.0 | 0        | 0.0 | 0        | 0.0 | 0        | 0.0 | 1              | 2.4 | 0         | 0.0 | 0        | 0.0 | 0        | 0.0 |
| Gingivitis                | 0              | 0.0 | 0        | 0.0 | 0        | 0.0 | 0        | 0.0 | 1              | 2.4 | 0         | 0.0 | 0        | 0.0 | 0        | 0.0 |
| Metrorrhagia              | 0              | 0.0 | 0        | 0.0 | 0        | 0.0 | 0        | 0.0 | 1              | 2.4 | 0         | 0.0 | 0        | 0.0 | 0        | 0.0 |
| Xerostomia                | 0              | 0.0 | 0        | 0.0 | 0        | 0.0 | 0        | 0.0 | 1              | 2.4 | 0         | 0.0 | 0        | 0.0 | 0        | 0.0 |
| Acute gastroenteritis     | 0              | 0.0 | 0        | 0.0 | 0        | 0.0 | 0        | 0.0 | 1              | 2.4 | 0         | 0.0 | 0        | 0.0 | 0        | 0.0 |
| Pain                      | 0              | 0.0 | 0        | 0.0 | 0        | 0.0 | 0        | 0.0 | 2              | 4.9 | 0         | 0.0 | 0        | 0.0 | 0        | 0.0 |
| Fluid retention           | 0              | 0.0 | 0        | 0.0 | 0        | 0.0 | 0        | 0.0 | 1              | 2.4 | 0         | 0.0 | 0        | 0.0 | 0        | 0.0 |
| Hyperpigmentation         | 0              | 0.0 | 0        | 0.0 | 0        | 0.0 | 0        | 0.0 | 1              | 2.4 | 0         | 0.0 | 0        | 0.0 | 0        | 0.0 |
| Hand-Foot syndrome        | 0              | 0.0 | 0        | 0.0 | 0        | 0.0 | 0        | 0.0 | 1              | 2.4 | 0         | 0.0 | 0        | 0.0 | 0        | 0.0 |
| Arthrosis                 | 0              | 0.0 | 0        | 0.0 | 0        | 0.0 | 0        | 0.0 | 1              | 2.4 | 0         | 0.0 | 0        | 0.0 | 0        | 0.0 |
| Polyphagia                | 1              | 2.6 | 0        | 0.0 | 0        | 0.0 | 0        | 0.0 | 0              | 0.0 | 0         | 0.0 | 0        | 0.0 | 0        | 0.0 |
| <b>Total</b>              | <b>30</b>      |     | <b>9</b> |     | <b>0</b> |     | <b>0</b> |     | <b>37</b>      |     | <b>10</b> |     | <b>0</b> |     | <b>0</b> |     |

**Supplementary Table 10: Description of the serious adverse events (SAEs) reported**

| Patient code | Treatment Arm | SAE                           | Related to treatment                     |
|--------------|---------------|-------------------------------|------------------------------------------|
| 624          | A             | Respiratory infection         | Unrelated (Influenza Type A infection)   |
| 1210         | A             | Febrile neutropenia (grade 4) | Possible (FEC-related)                   |
| 1510         | A             | Septic arthritis              | Possible (Neoadjuvant treatment-related) |
| 1503         | B             | Febrile neutropenia (grade 3) | Definite (FEC-related)                   |
| 1903         | B             | Febrile neutropenia (grade 3) | Definite (FEC-related)                   |

**Supplementary Table 11: Descriptive of LVEF changes in the mITT population**

|                              | Arm A                | Arm B                |                                 |                       |
|------------------------------|----------------------|----------------------|---------------------------------|-----------------------|
| <b>Baseline</b>              | <i>N</i> = 38        | <i>N</i> = 41        |                                 |                       |
| Mean ± SD                    | 64.38 ± 6.54         | 64.55 ± 5.68         |                                 |                       |
| Median (P25, P75)            | 65.00 (58.00, 69.25) | 64.00 (61.00, 68.50) |                                 |                       |
| <b>Week 12</b>               | <i>N</i> = 34        | <i>N</i> = 40        |                                 |                       |
| Mean ± SD                    | 62.10 ± 6.73         | 63.09 ± 6.96         |                                 |                       |
| Median (P25, P75)            | 61.50 (56.75, 66.75) | 62.50 (58.00, 68.00) |                                 |                       |
| <b>End of treatment</b>      | <i>N</i> = 32        | <i>N</i> = 37        |                                 |                       |
| Mean ± SD                    | 59.67 ± 5.07         | 60.04 ± 6.41         |                                 |                       |
| Median (P25, P75)            | 61.00 (55.25, 63.50) | 58.00 (56.00, 64.50) |                                 |                       |
| <b>Change (End-Baseline)</b> | <i>N</i> = 32        | <i>N</i> = 37        | <b>Mean difference (95% CI)</b> | <b><i>P</i> value</b> |
| Mean ± SD                    | -3.96 ± 6.27         | -4.68 ± 5.89         | 0.72 [-2.21 to 3.64]            | 0.625                 |
| Median (P25, P75)            | -4.00 (-6.00, -1.78) | -5.00 (-7.50, -1.00) | 0.00 [-2.00 to 3.00]            | 0.754                 |
